# Supplementary material for: Cannabinoid receptor 2 expression in early-stage non-small cell lung cancers identifies patients with good prognosis and longer survival
Source: PubMed Central journal article supplement — Transl Lung Cancer Res. 2022 Oct;11(10):2040–50. doi: 10.21037/tlcr-22-247 (PMC9641041; doi:10.21037/tlcr-22-247), 2022-10
Supplement: tlcr-11-10-2040-coif.pdf [file tlcr-11-10-2040-coif.pdf]

## ICMJE DISCLOSURE FORM

Date: April 25<sup>th</sup>, 2022

Your Name: Monika Vidlarova

Manuscript Title: Cannabinoid receptor 2 expression in early stage non-small cell lung cancers identifies patients with good prognosis and longer survival

Manuscript number (if known): TLCR-22-247

In the interest of transparency, we ask you to disclose all relationships/activities/interests listed below that are related to the content of your manuscript. "Related" means any relation with for-profit or not-for-profit third parties whose interests may be affected by the content of the manuscript. Disclosure represents a commitment to transparency and does not necessarily indicate a bias. If you are in doubt about whether to list a relationship/activity/interest, it is preferable that you do so.

The following questions apply to the author's relationships/activities/interests as they relate to the current manuscript only.

The author's relationships/activities/interests should be defined broadly. For example, if your manuscript pertains to the epidemiology of hypertension, you should declare all relationships with manufacturers of antihypertensive medication, even if that medication is not mentioned in the manuscript.

In item #1 below, report all support for the work reported in this manuscript without time limit. For all other items, the time frame for disclosure is the past 36 months.

|                                                           |                                                                                                                                                                                | Name all entities with whom you have this relationship or indicate none (add rows as needed)                                                                                                                                                                                                                                                                  | Specifications/Comments (e.g., if payments were made to you or to your institution)                                                       |
|-----------------------------------------------------------|--------------------------------------------------------------------------------------------------------------------------------------------------------------------------------|---------------------------------------------------------------------------------------------------------------------------------------------------------------------------------------------------------------------------------------------------------------------------------------------------------------------------------------------------------------|-------------------------------------------------------------------------------------------------------------------------------------------|
| <b>Time frame: Since the initial planning of the work</b> |                                                                                                                                                                                |                                                                                                                                                                                                                                                                                                                                                               |                                                                                                                                           |
| 1                                                         | All support for the present manuscript (e.g., funding, provision of study materials, medical writing, article processing charges, etc.)<br><b>No time limit for this item.</b> | Ministry of Health of the Czech Republic [NV18-03-00470]<br><br>Ministry of Education, Youth and Sport of the Czech Republic [LM2018125, LM2018133]<br><br>Palacky University Olomouc [LF 2021_019]<br><br>Technological Agency of the Czech Republic [TN01000013]<br><br>European Union - Next Generation EU (Programme EXCELES, ID Project No. LX22NPO5102) | Institutional funding<br><br>Institutional funding<br><br>Institutional funding<br><br>Institutional funding<br><br>Institutional funding |
|                                                           |                                                                                                                                                                                |                                                                                                                                                                                                                                                                                                                                                               |                                                                                                                                           |
|                                                           |                                                                                                                                                                                |                                                                                                                                                                                                                                                                                                                                                               |                                                                                                                                           |

| Time frame: past 36 months |                                                                                                              |                                          |  |
|----------------------------|--------------------------------------------------------------------------------------------------------------|------------------------------------------|--|
| 2                          | Grants or contracts from any entity (if not indicated in item #1 above).                                     | <input checked="" type="checkbox"/> None |  |
| 3                          | Royalties or licenses                                                                                        | <input checked="" type="checkbox"/> None |  |
| 4                          | Consulting fees                                                                                              | <input checked="" type="checkbox"/> None |  |
| 5                          | Payment or honoraria for lectures, presentations, speakers bureaus, manuscript writing or educational events | <input checked="" type="checkbox"/> None |  |
| 6                          | Payment for expert testimony                                                                                 | <input checked="" type="checkbox"/> None |  |
| 7                          | Support for attending meetings and/or travel                                                                 | <input checked="" type="checkbox"/> None |  |
| 8                          | Patents planned, issued or pending                                                                           | <input checked="" type="checkbox"/> None |  |
| 9                          | Participation on a Data Safety Monitoring Board or Advisory Board                                            | <input checked="" type="checkbox"/> None |  |
| 10                         | Leadership or fiduciary role in other board, society, committee or advocacy group, paid or unpaid            | <input checked="" type="checkbox"/> None |  |
| 11                         | Stock or stock options                                                                                       | <input checked="" type="checkbox"/> None |  |
| 12                         | Receipt of equipment, materials, drugs, medical writing, gifts or other services                             | <input checked="" type="checkbox"/> None |  |
| 13                         | Other financial or non-financial interests                                                                   | <input checked="" type="checkbox"/> None |  |

**Please summarize the above conflict of interest in the following box:**

The study was supported by institutional fundings by Ministry of Health of the Czech Republic [NV18-03-00470], Ministry of Education, Youth and Sport of the Czech Republic [LM2018125, LM2018133], Palacky University Olomouc [LF 2021\_019], Technological Agency of the Czech Republic [TN01000013] and European Union - Next Generation EU (Programme EXCELES, ID Project No. LX22NPO5102).

**Please place an "X" next to the following statement to indicate your agreement:**

**I certify that I have answered every question and have not altered the wording of any of the questions on this form. X**

## ICMJE DISCLOSURE FORM

Date: March 30, 2022

Your Name: Emil Berta

Manuscript Title: Cannabinoid receptor 2 expression in early stage non-small cell lung cancers identifies patients with good prognosis and longer survival

Manuscript number (if known): TLCR-22-247

In the interest of transparency, we ask you to disclose all relationships/activities/interests listed below that are related to the content of your manuscript. "Related" means any relation with for-profit or not-for-profit third parties whose interests may be affected by the content of the manuscript. Disclosure represents a commitment to transparency and does not necessarily indicate a bias. If you are in doubt about whether to list a relationship/activity/interest, it is preferable that you do so.

The following questions apply to the author's relationships/activities/interests as they relate to the current manuscript only.

The author's relationships/activities/interests should be defined broadly. For example, if your manuscript pertains to the epidemiology of hypertension, you should declare all relationships with manufacturers of antihypertensive medication, even if that medication is not mentioned in the manuscript.

In item #1 below, report all support for the work reported in this manuscript without time limit. For all other items, the time frame for disclosure is the past 36 months.

|                                                           |                                                                                                                                                                                | Name all entities with whom you have this relationship or indicate none (add rows as needed) | Specifications/Comments (e.g., if payments were made to you or to your institution) |
|-----------------------------------------------------------|--------------------------------------------------------------------------------------------------------------------------------------------------------------------------------|----------------------------------------------------------------------------------------------|-------------------------------------------------------------------------------------|
| <b>Time frame: Since the initial planning of the work</b> |                                                                                                                                                                                |                                                                                              |                                                                                     |
| 1                                                         | All support for the present manuscript (e.g., funding, provision of study materials, medical writing, article processing charges, etc.)<br><b>No time limit for this item.</b> | Ministry of Health of the Czech Republic [NV18-03-00470]                                     | Institutional funding                                                               |
|                                                           |                                                                                                                                                                                | Ministry of Education, Youth and Sport of the Czech Republic [LM2018125, LM2018133]          | Institutional funding                                                               |
|                                                           |                                                                                                                                                                                | European Union - Next Generation EU (Programme EXCELES, ID Project No. LX22NPO5102)          | Institutional funding                                                               |
| <b>Time frame: past 36 months</b>                         |                                                                                                                                                                                |                                                                                              |                                                                                     |
| 2                                                         | Grants or contracts from any entity (if not indicated in item #1 above).                                                                                                       | ___ None                                                                                     |                                                                                     |
| 3                                                         | Royalties or licenses                                                                                                                                                          | ___ None                                                                                     |                                                                                     |

|    |                                                                                                              |          |  |
|----|--------------------------------------------------------------------------------------------------------------|----------|--|
|    |                                                                                                              |          |  |
| 4  | Consulting fees                                                                                              | ___ None |  |
| 5  | Payment or honoraria for lectures, presentations, speakers bureaus, manuscript writing or educational events | ___ None |  |
| 6  | Payment for expert testimony                                                                                 | ___ None |  |
| 7  | Support for attending meetings and/or travel                                                                 | ___ None |  |
| 8  | Patents planned, issued or pending                                                                           | ___ None |  |
| 9  | Participation on a Data Safety Monitoring Board or Advisory Board                                            | ___ None |  |
| 10 | Leadership or fiduciary role in other board, society, committee or advocacy group, paid or unpaid            | ___ None |  |
| 11 | Stock or stock options                                                                                       | _ None   |  |
| 12 | Receipt of equipment, materials, drugs, medical writing, gifts or other services                             | ___ None |  |
| 13 | Other financial or non-financial interests                                                                   | ___ None |  |

**Please summarize the above conflict of interest in the following box:**

The study was supported by institutional fundings by Ministry of Health of the Czech Republic [NV18-03-00470], Ministry of Education, Youth and Sport of the Czech Republic [LM2018125, LM2018133],] and European Union - Next Generation EU (Programme EXCELES, ID Project No. LX22NPO5102).

**Please place an "X" next to the following statement to indicate your agreement:**

**I certify that I have answered every question and have not altered the wording of any of the questions on this form. X**



## ICMJE DISCLOSURE FORM

Date: 24.04.2022

Your Name: Petr Prasil

Manuscript Title: Cannabinoid receptor 2 expression in early stage non-small cell lung cancers identifies patients with good prognosis and longer survival

Manuscript number (if known): TLCR-22-247

In the interest of transparency, we ask you to disclose all relationships/activities/interests listed below that are related to the content of your manuscript. "Related" means any relation with for-profit or not-for-profit third parties whose interests may be affected by the content of the manuscript. Disclosure represents a commitment to transparency and does not necessarily indicate a bias. If you are in doubt about whether to list a relationship/activity/interest, it is preferable that you do so.

The following questions apply to the author's relationships/activities/interests as they relate to the current manuscript only.

The author's relationships/activities/interests should be defined broadly. For example, if your manuscript pertains to the epidemiology of hypertension, you should declare all relationships with manufacturers of antihypertensive medication, even if that medication is not mentioned in the manuscript.

In item #1 below, report all support for the work reported in this manuscript without time limit. For all other items, the time frame for disclosure is the past 36 months.

|                                                           |                                                                                                                                                                                | Name all entities with whom you have this relationship or indicate none (add rows as needed) | Specifications/Comments (e.g., if payments were made to you or to your institution) |
|-----------------------------------------------------------|--------------------------------------------------------------------------------------------------------------------------------------------------------------------------------|----------------------------------------------------------------------------------------------|-------------------------------------------------------------------------------------|
| <b>Time frame: Since the initial planning of the work</b> |                                                                                                                                                                                |                                                                                              |                                                                                     |
| 1                                                         | All support for the present manuscript (e.g., funding, provision of study materials, medical writing, article processing charges, etc.)<br><b>No time limit for this item.</b> | Ministry of Health of the Czech Republic [NV18-03-00470]                                     | Institutional funding                                                               |
|                                                           |                                                                                                                                                                                |                                                                                              |                                                                                     |
|                                                           |                                                                                                                                                                                |                                                                                              |                                                                                     |
|                                                           |                                                                                                                                                                                |                                                                                              |                                                                                     |
|                                                           |                                                                                                                                                                                |                                                                                              |                                                                                     |
| <b>Time frame: past 36 months</b>                         |                                                                                                                                                                                |                                                                                              |                                                                                     |
| 2                                                         | Grants or contracts from any entity (if not indicated in item #1 above).                                                                                                       | ___ None                                                                                     |                                                                                     |
| 3                                                         | Royalties or licenses                                                                                                                                                          | ___ None                                                                                     |                                                                                     |
| 4                                                         | Consulting fees                                                                                                                                                                | ___ None                                                                                     |                                                                                     |
| 5                                                         |                                                                                                                                                                                | ___ None                                                                                     |                                                                                     |

|    |                                                                                                              |          |  |
|----|--------------------------------------------------------------------------------------------------------------|----------|--|
|    | Payment or honoraria for lectures, presentations, speakers bureaus, manuscript writing or educational events |          |  |
| 6  | Payment for expert testimony                                                                                 | ___ None |  |
| 7  | Support for attending meetings and/or travel                                                                 | ___ None |  |
| 8  | Patents planned, issued or pending                                                                           | ___ None |  |
| 9  | Participation on a Data Safety Monitoring Board or Advisory Board                                            | ___ None |  |
| 10 | Leadership or fiduciary role in other board, society, committee or advocacy group, paid or unpaid            | ___ None |  |
| 11 | Stock or stock options                                                                                       | ___ None |  |
| 12 | Receipt of equipment, materials, drugs, medical writing, gifts or other services                             | ___ None |  |
| 13 | Other financial or non-financial interests                                                                   | ___ None |  |

**Please summarize the above conflict of interest in the following box:**

The study was supported by institutional fundings by Ministry of Health of the Czech Republic [NV18-03-00470].

**Please place an "X" next to the following statement to indicate your agreement:**

**I certify that I have answered every question and have not altered the wording of any of the questions on this form. X**



## ICMJE DISCLOSURE FORM

Date: March 30, 2022

Your Name: Andrea Prokopova

Manuscript Title: Cannabinoid receptor 2 expression in early stage non-small cell lung cancers identifies patients with good prognosis and longer survival

Manuscript number (if known): TLCR-22-247

In the interest of transparency, we ask you to disclose all relationships/activities/interests listed below that are related to the content of your manuscript. "Related" means any relation with for-profit or not-for-profit third parties whose interests may be affected by the content of the manuscript. Disclosure represents a commitment to transparency and does not necessarily indicate a bias. If you are in doubt about whether to list a relationship/activity/interest, it is preferable that you do so.

The following questions apply to the author's relationships/activities/interests as they relate to the current manuscript only.

The author's relationships/activities/interests should be defined broadly. For example, if your manuscript pertains to the epidemiology of hypertension, you should declare all relationships with manufacturers of antihypertensive medication, even if that medication is not mentioned in the manuscript.

In item #1 below, report all support for the work reported in this manuscript without time limit. For all other items, the time frame for disclosure is the past 36 months.

|                                                           |                                                                                                                                                                                | Name all entities with whom you have this relationship or indicate none (add rows as needed) | Specifications/Comments (e.g., if payments were made to you or to your institution) |
|-----------------------------------------------------------|--------------------------------------------------------------------------------------------------------------------------------------------------------------------------------|----------------------------------------------------------------------------------------------|-------------------------------------------------------------------------------------|
| <b>Time frame: Since the initial planning of the work</b> |                                                                                                                                                                                |                                                                                              |                                                                                     |
| 1                                                         | All support for the present manuscript (e.g., funding, provision of study materials, medical writing, article processing charges, etc.)<br><b>No time limit for this item.</b> |                                                                                              |                                                                                     |
|                                                           |                                                                                                                                                                                |                                                                                              |                                                                                     |
|                                                           |                                                                                                                                                                                |                                                                                              |                                                                                     |
|                                                           |                                                                                                                                                                                |                                                                                              |                                                                                     |
|                                                           |                                                                                                                                                                                |                                                                                              |                                                                                     |
|                                                           |                                                                                                                                                                                |                                                                                              |                                                                                     |
| <b>Time frame: past 36 months</b>                         |                                                                                                                                                                                |                                                                                              |                                                                                     |
| 2                                                         | Grants or contracts from any entity (if not indicated in item #1 above).                                                                                                       | ___ None                                                                                     |                                                                                     |
|                                                           |                                                                                                                                                                                |                                                                                              |                                                                                     |
| 3                                                         | Royalties or licenses                                                                                                                                                          | ___ None                                                                                     |                                                                                     |
|                                                           |                                                                                                                                                                                |                                                                                              |                                                                                     |
| 4                                                         | Consulting fees                                                                                                                                                                | ___ None                                                                                     |                                                                                     |
|                                                           |                                                                                                                                                                                |                                                                                              |                                                                                     |

|    |                                                                                                              |           |  |
|----|--------------------------------------------------------------------------------------------------------------|-----------|--|
| 5  | Payment or honoraria for lectures, presentations, speakers bureaus, manuscript writing or educational events | ____ None |  |
| 6  | Payment for expert testimony                                                                                 | ____ None |  |
| 7  | Support for attending meetings and/or travel                                                                 | ____ None |  |
| 8  | Patents planned, issued or pending                                                                           | ____ None |  |
| 9  | Participation on a Data Safety Monitoring Board or Advisory Board                                            | ____ None |  |
| 10 | Leadership or fiduciary role in other board, society, committee or advocacy group, paid or unpaid            | ____ None |  |
| 11 | Stock or stock options                                                                                       | ____ None |  |
| 12 | Receipt of equipment, materials, drugs, medical writing, gifts or other services                             | ____ None |  |
| 13 | Other financial or non-financial interests                                                                   | ____ None |  |

**Please summarize the above conflict of interest in the following box:**

Nothing to disclose.

**Please place an "X" next to the following statement to indicate your agreement:**

**I certify that I have answered every question and have not altered the wording of any of the questions on this form. X**

## ICMJE DISCLOSURE FORM

Date: April 28, 2022

Your Name: Soňa Gurská

Manuscript Title: Cannabinoid receptor 2 expression in early stage non-small cell lung cancers identifies patients with good prognosis and longer survival

Manuscript number (if known): TLCR-22-247

In the interest of transparency, we ask you to disclose all relationships/activities/interests listed below that are related to the content of your manuscript. “Related” means any relation with for-profit or not-for-profit third parties whose interests may be affected by the content of the manuscript. Disclosure represents a commitment to transparency and does not necessarily indicate a bias. If you are in doubt about whether to list a relationship/activity/interest, it is preferable that you do so.

The following questions apply to the author’s relationships/activities/interests as they relate to the current manuscript only.

The author’s relationships/activities/interests should be defined broadly. For example, if your manuscript pertains to the epidemiology of hypertension, you should declare all relationships with manufacturers of antihypertensive medication, even if that medication is not mentioned in the manuscript.

In item #1 below, report all support for the work reported in this manuscript without time limit. For all other items, the time frame for disclosure is the past 36 months.

|                                                           |                                                                                                                                                                                | Name all entities with whom you have this relationship or indicate none (add rows as needed)                                                                                                                                                                                                                                                  | Specifications/Comments (e.g., if payments were made to you or to your institution)                                       |
|-----------------------------------------------------------|--------------------------------------------------------------------------------------------------------------------------------------------------------------------------------|-----------------------------------------------------------------------------------------------------------------------------------------------------------------------------------------------------------------------------------------------------------------------------------------------------------------------------------------------|---------------------------------------------------------------------------------------------------------------------------|
| <b>Time frame: Since the initial planning of the work</b> |                                                                                                                                                                                |                                                                                                                                                                                                                                                                                                                                               |                                                                                                                           |
| 1                                                         | All support for the present manuscript (e.g., funding, provision of study materials, medical writing, article processing charges, etc.)<br><b>No time limit for this item.</b> | Ministry of Health of the Czech Republic [NV18-03-00470]<br>Ministry of Education, Youth and Sport of the Czech Republic [LM2018125, LM2018133]<br>Palacky University Olomouc [LF 2021_019]<br>Technological Agency of the Czech Republic [TN01000013]<br>European Union - Next Generation EU (Programme EXCELES, ID Project No. LX22NPO5102) | Institutional funding<br>Institutional funding<br>Institutional funding<br>Institutional funding<br>Institutional funding |
|                                                           |                                                                                                                                                                                |                                                                                                                                                                                                                                                                                                                                               |                                                                                                                           |
|                                                           |                                                                                                                                                                                |                                                                                                                                                                                                                                                                                                                                               |                                                                                                                           |

| Time frame: past 36 months |                                                                                                              |          |  |
|----------------------------|--------------------------------------------------------------------------------------------------------------|----------|--|
| 2                          | Grants or contracts from any entity (if not indicated in item #1 above).                                     | ___ None |  |
| 3                          | Royalties or licenses                                                                                        | ___ None |  |
| 4                          | Consulting fees                                                                                              | ___ None |  |
| 5                          | Payment or honoraria for lectures, presentations, speakers bureaus, manuscript writing or educational events | ___ None |  |
| 6                          | Payment for expert testimony                                                                                 | ___ None |  |
| 7                          | Support for attending meetings and/or travel                                                                 | ___ None |  |
| 8                          | Patents planned, issued or pending                                                                           | ___ None |  |
| 9                          | Participation on a Data Safety Monitoring Board or Advisory Board                                            | ___ None |  |
| 10                         | Leadership or fiduciary role in other board, society, committee or advocacy group, paid or unpaid            | ___ None |  |
| 11                         | Stock or stock options                                                                                       | ___ None |  |
| 12                         | Receipt of equipment, materials, drugs, medical writing, gifts or other services                             | ___ None |  |
| 13                         | Other financial or non-financial interests                                                                   | ___ None |  |

**Please summarize the above conflict of interest in the following box:**

The study was supported by institutional fundings by Ministry of Health of the Czech Republic [NV18-03-00470], Ministry of Education, Youth and Sport of the Czech Republic [LM2018125, LM2018133], Palacky University Olomouc [LF 2021\_019], Technological Agency of the Czech Republic [TN01000013] and European Union - Next Generation EU (Programme EXCELES, ID Project No. LX22NPO5102).

**Please place an "X" next to the following statement to indicate your agreement:**

**I certify that I have answered every question and have not altered the wording of any of the questions on this form. X**

## ICMJE DISCLOSURE FORM

Date: March 30, 2022

Your Name: Marta Khoylu

Manuscript Title: Cannabinoid receptor 2 expression in early stage non-small cell lung cancers identifies patients with good prognosis and longer survival

Manuscript number (if known): TLCR-22-247

In the interest of transparency, we ask you to disclose all relationships/activities/interests listed below that are related to the content of your manuscript. "Related" means any relation with for-profit or not-for-profit third parties whose interests may be affected by the content of the manuscript. Disclosure represents a commitment to transparency and does not necessarily indicate a bias. If you are in doubt about whether to list a relationship/activity/interest, it is preferable that you do so.

The following questions apply to the author's relationships/activities/interests as they relate to the current manuscript only.

The author's relationships/activities/interests should be defined broadly. For example, if your manuscript pertains to the epidemiology of hypertension, you should declare all relationships with manufacturers of antihypertensive medication, even if that medication is not mentioned in the manuscript.

In item #1 below, report all support for the work reported in this manuscript without time limit. For all other items, the time frame for disclosure is the past 36 months.

|                                                           |                                                                                                                                                                   | Name all entities with which you have this relationship or interest (none add rows as needed) | Specifications/Comments (e.g., if payments were made to you or to your institution) |
|-----------------------------------------------------------|-------------------------------------------------------------------------------------------------------------------------------------------------------------------|-----------------------------------------------------------------------------------------------|-------------------------------------------------------------------------------------|
| <b>Time frame: Since the initial planning of the work</b> |                                                                                                                                                                   |                                                                                               |                                                                                     |
| 1                                                         | All support for the manuscript (e.g., funding, purchase of study materials, medical writing, article processing charges, etc) <b>No time limit for this item.</b> | Ministry of Health of the Czech Republic [NV18-03-00470]                                      | Institutional funding                                                               |
|                                                           |                                                                                                                                                                   | Ministry of Education, Youth and Sports of the Czech Republic [LM2018125, LM2018133]          | Institutional funding                                                               |
|                                                           |                                                                                                                                                                   | European Union - Next Generation EU (Programme EXCELES, ID No. LX22NPO5102)                   | Institutional funding                                                               |
| <b>Time frame: past 36 months</b>                         |                                                                                                                                                                   |                                                                                               |                                                                                     |
| 2                                                         | Grants or contracts from any entity not indicated in item #1 above                                                                                                | None                                                                                          |                                                                                     |
| 3                                                         | Royalties or licenses                                                                                                                                             | None                                                                                          |                                                                                     |
| 4                                                         | Consulting fees                                                                                                                                                   | None                                                                                          |                                                                                     |

|    |                                                                                                              |      |  |
|----|--------------------------------------------------------------------------------------------------------------|------|--|
|    |                                                                                                              |      |  |
| 5  | Payment or honoraria for lectures, presentations, speakers bureaus, manuscript writing or educational events | None |  |
| 6  | Payment for expert testimony                                                                                 | None |  |
| 7  | Support for attending meetings and/or travel                                                                 | None |  |
| 8  | Patents planned, issued or pending                                                                           | None |  |
| 9  | Participation on a Data Safety Monitoring Board or Advisory Board                                            | None |  |
| 10 | Leadership or fiduciary role in a board, society, committee or advocacy group, paid or unpaid                | None |  |
| 11 | Stock or stock options                                                                                       | None |  |
| 12 | Receipt of equipment, materials, drugs, medical writing, gifts or services                                   | None |  |
| 13 | Other financial or non-financial interests                                                                   | None |  |

**Please summarize the above conflict of interest in the following box:**

The study was supported by institutional fundings by Ministry of Health of the Czech Republic [NV18-03-00470], Ministry of Education, Youth and Sport of the Czech Republic [LM2018125, LM2018133] and European Union - Next Generation EU (Programme EXCELES, ID Project No. LX22NPO5102).

**Please place an "X" next to the following statement to indicate your agreement:**

**I certify that I have answered every question and have not altered the wording of any of the questions on this form. X**

## ICMJE DISCLOSURE FORM

Date: May 5, 2022

Your Name: Alona Rehulkova

Manuscript Title: Cannabinoid receptor 2 expression in early stage non-small cell lung cancers identifies patients with good prognosis and longer survival

Manuscript number (if known): TLCR-22-247

In the interest of transparency, we ask you to disclose all relationships/activities/interests listed below that are related to the content of your manuscript. "Related" means any relation with for-profit or not-for-profit third parties whose interests may be affected by the content of the manuscript. Disclosure represents a commitment to transparency and does not necessarily indicate a bias. If you are in doubt about whether to list a relationship/activity/interest, it is preferable that you do so.

The following questions apply to the author's relationships/activities/interests as they relate to the current manuscript only.

The author's relationships/activities/interests should be defined broadly. For example, if your manuscript pertains to the epidemiology of hypertension, you should declare all relationships with manufacturers of antihypertensive medication, even if that medication is not mentioned in the manuscript.

In item #1 below, report all support for the work reported in this manuscript without time limit. For all other items, the time frame for disclosure is the past 36 months.

|                                                           |                                                                                                                                                                                           | Name all entities with whom you have this relationship or interest (add rows as needed) | Specifications/Comments (e.g., if payments were made to you or to your institution) |
|-----------------------------------------------------------|-------------------------------------------------------------------------------------------------------------------------------------------------------------------------------------------|-----------------------------------------------------------------------------------------|-------------------------------------------------------------------------------------|
| <b>Time frame: Since the initial planning of the work</b> |                                                                                                                                                                                           |                                                                                         |                                                                                     |
| 1                                                         | All support for the preparation of the manuscript (e.g., funding, provision of study materials, medical writing, article processing charges, etc.)<br><b>No time limit for this item.</b> | Ministry of Health of the Czech Republic [NV18-03-00470]                                | Institutional funding                                                               |
|                                                           |                                                                                                                                                                                           | Ministry of Education, Youth and Sports of the Czech Republic [LM2018125, LM2018133]    | Institutional funding                                                               |
|                                                           |                                                                                                                                                                                           | Palacky University Olomouc [2021_019]                                                   | Institutional funding                                                               |
|                                                           |                                                                                                                                                                                           | Technological Agency of the Czech Republic [TN01000013]                                 | Institutional funding                                                               |
|                                                           |                                                                                                                                                                                           | European Union - Next Generation EU (Programme EXCELSIOR) Project No. LX22NPO5102)      | Institutional funding                                                               |
|                                                           |                                                                                                                                                                                           |                                                                                         |                                                                                     |
| <b>Time frame: past 36 months</b>                         |                                                                                                                                                                                           |                                                                                         |                                                                                     |
| 2                                                         |                                                                                                                                                                                           | None                                                                                    |                                                                                     |



|    |                                                                                                              |      |  |
|----|--------------------------------------------------------------------------------------------------------------|------|--|
|    | Grants or contracts from any (if not indicated in item #1 above)                                             |      |  |
| 3  | Royalties or licenses                                                                                        | None |  |
| 4  | Consulting fees                                                                                              | None |  |
| 5  | Payment or honoraria for lectures, presentations, speakers bureaus, manuscript writing or educational events | None |  |
| 6  | Payment for expert testimony                                                                                 | None |  |
| 7  | Support for attending meetings and/or travel                                                                 | None |  |
| 8  | Patents planned, issued or pending                                                                           | None |  |
| 9  | Participation on a Data Safety Monitoring Board or Advisory Board                                            | None |  |
| 10 | Leadership or fiduciary role in board, society, committee or advocacy group, paid or unpaid                  | None |  |
| 11 | Stock or stock options                                                                                       | None |  |
| 12 | Receipt of equipment, materials, drugs, medical writing, gifts or services                                   | None |  |
| 13 | Other financial or non-financial interests                                                                   | None |  |

**Please summarize the above conflict of interest in the following box:**

The study was supported by institutional fundings by Ministry of Health of the Czech Republic [NV18-03-00470], Ministry of Education, Youth and Sport of the Czech Republic [LM2018125, LM2018133], Palacky University Olomouc [LF 2021\_019], Technological Agency of the Czech Republic [TN01000013] and European Union - Next Generation EU (Programme EXCELES, ID Project No. LX22NPO5102).

**Please place an "X" next to the following statement to indicate your agreement:**

**I certify that I have answered every question and have not altered the wording of any of the questions on this form. X**

## ICMJE DISCLOSURE FORM

Date: March 30, 2022

Your Name: Pavla Kourilova

Manuscript Title: Cannabinoid receptor 2 expression in early stage non-small cell lung cancers identifies patients with good prognosis and longer survival

Manuscript number (if known): TLCR-22-247

In the interest of transparency, we ask you to disclose all relationships/activities/interests listed below that are related to the content of your manuscript. "Related" means any relation with for-profit or not-for-profit third parties whose interests may be affected by the content of the manuscript. Disclosure represents a commitment to transparency and does not necessarily indicate a bias. If you are in doubt about whether to list a relationship/activity/interest, it is preferable that you do so.

The following questions apply to the author's relationships/activities/interests as they relate to the current manuscript only.

The author's relationships/activities/interests should be defined broadly. For example, if your manuscript pertains to the epidemiology of hypertension, you should declare all relationships with manufacturers of antihypertensive medication, even if that medication is not mentioned in the manuscript.

In item #1 below, report all support for the work reported in this manuscript without time limit. For all other items, the time frame for disclosure is the past 36 months.

|                                                           |                                                                                                                                                                                | Name all entities with whom you have this relationship or indicate none (add rows as needed) | Specifications/Comments (e.g., if payments were made to you or to your institution) |
|-----------------------------------------------------------|--------------------------------------------------------------------------------------------------------------------------------------------------------------------------------|----------------------------------------------------------------------------------------------|-------------------------------------------------------------------------------------|
| <b>Time frame: Since the initial planning of the work</b> |                                                                                                                                                                                |                                                                                              |                                                                                     |
| 1                                                         | All support for the present manuscript (e.g., funding, provision of study materials, medical writing, article processing charges, etc.)<br><b>No time limit for this item.</b> | Ministry of Health of the Czech Republic [NV18-03-00470]                                     | Institutional funding                                                               |
|                                                           |                                                                                                                                                                                | Ministry of Education, Youth and Sport of the Czech Republic [LM2018125, LM2018133]          | Institutional funding                                                               |
|                                                           |                                                                                                                                                                                | European Union - Next Generation EU (Programme EXCELES, ID Project No. LX22NPO5102)          | Institutional funding                                                               |
| <b>Time frame: past 36 months</b>                         |                                                                                                                                                                                |                                                                                              |                                                                                     |
| 2                                                         | Grants or contracts from any entity (if not indicated in item #1 above).                                                                                                       | None                                                                                         |                                                                                     |
| 3                                                         | Royalties or licenses                                                                                                                                                          | None                                                                                         |                                                                                     |

|    |                                                                                                              |          |  |
|----|--------------------------------------------------------------------------------------------------------------|----------|--|
|    |                                                                                                              |          |  |
| 4  | Consulting fees                                                                                              | ___ None |  |
|    |                                                                                                              |          |  |
|    |                                                                                                              |          |  |
| 5  | Payment or honoraria for lectures, presentations, speakers bureaus, manuscript writing or educational events | ___ None |  |
|    |                                                                                                              |          |  |
|    |                                                                                                              |          |  |
| 6  | Payment for expert testimony                                                                                 | ___ None |  |
|    |                                                                                                              |          |  |
|    |                                                                                                              |          |  |
| 7  | Support for attending meetings and/or travel                                                                 | ___ None |  |
|    |                                                                                                              |          |  |
|    |                                                                                                              |          |  |
| 8  | Patents planned, issued or pending                                                                           | ___ None |  |
|    |                                                                                                              |          |  |
|    |                                                                                                              |          |  |
| 9  | Participation on a Data Safety Monitoring Board or Advisory Board                                            | ___ None |  |
|    |                                                                                                              |          |  |
|    |                                                                                                              |          |  |
| 10 | Leadership or fiduciary role in other board, society, committee or advocacy group, paid or unpaid            | ___ None |  |
|    |                                                                                                              |          |  |
|    |                                                                                                              |          |  |
| 11 | Stock or stock options                                                                                       | _ None   |  |
|    |                                                                                                              |          |  |
|    |                                                                                                              |          |  |
| 12 | Receipt of equipment, materials, drugs, medical writing, gifts or other services                             | ___ None |  |
|    |                                                                                                              |          |  |
|    |                                                                                                              |          |  |
| 13 | Other financial or non-financial interests                                                                   | ___ None |  |
|    |                                                                                                              |          |  |
|    |                                                                                                              |          |  |

**Please summarize the above conflict of interest in the following box:**

The study was supported by institutional fundings by Ministry of Health of the Czech Republic [NV18-03-00470], Ministry of Education, Youth and Sport of the Czech Republic [LM2018125, LM2018133] and European Union - Next Generation EU (Programme EXCELES, ID Project No. LX22NPO5102).

**Please place an "X" next to the following statement to indicate your agreement:**

**I certify that I have answered every question and have not altered the wording of any of the questions on this form. X**

## ICMJE DISCLOSURE FORM

Date: March 30, 2022

Your Name: Josef Chudacek

Manuscript Title: Cannabinoid receptor 2 expression in early stage non-small cell lung cancers identifies patients with good prognosis and longer survival

Manuscript number (if known): TLCR-22-247

In the interest of transparency, we ask you to disclose all relationships/activities/interests listed below that are related to the content of your manuscript. "Related" means any relation with for-profit or not-for-profit third parties whose interests may be affected by the content of the manuscript. Disclosure represents a commitment to transparency and does not necessarily indicate a bias. If you are in doubt about whether to list a relationship/activity/interest, it is preferable that you do so.

The following questions apply to the author's relationships/activities/interests as they relate to the current manuscript only.

The author's relationships/activities/interests should be defined broadly. For example, if your manuscript pertains to the epidemiology of hypertension, you should declare all relationships with manufacturers of antihypertensive medication, even if that medication is not mentioned in the manuscript.

In item #1 below, report all support for the work reported in this manuscript without time limit. For all other items, the time frame for disclosure is the past 36 months.

|                                                           |                                                                                                                                                                                | Name all entities with whom you have this relationship or indicate none (add rows as needed) | Specifications/Comments (e.g., if payments were made to you or to your institution) |
|-----------------------------------------------------------|--------------------------------------------------------------------------------------------------------------------------------------------------------------------------------|----------------------------------------------------------------------------------------------|-------------------------------------------------------------------------------------|
| <b>Time frame: Since the initial planning of the work</b> |                                                                                                                                                                                |                                                                                              |                                                                                     |
| 1                                                         | All support for the present manuscript (e.g., funding, provision of study materials, medical writing, article processing charges, etc.)<br><b>No time limit for this item.</b> | Ministry of Health of the Czech Republic [NV18-03-00470]                                     | Institutional funding                                                               |
|                                                           |                                                                                                                                                                                |                                                                                              |                                                                                     |
|                                                           |                                                                                                                                                                                |                                                                                              |                                                                                     |
|                                                           |                                                                                                                                                                                |                                                                                              |                                                                                     |
|                                                           |                                                                                                                                                                                |                                                                                              |                                                                                     |
|                                                           |                                                                                                                                                                                |                                                                                              |                                                                                     |
| <b>Time frame: past 36 months</b>                         |                                                                                                                                                                                |                                                                                              |                                                                                     |
| 2                                                         | Grants or contracts from any entity (if not indicated in item #1 above).                                                                                                       | ___ None                                                                                     |                                                                                     |
|                                                           |                                                                                                                                                                                |                                                                                              |                                                                                     |
| 3                                                         | Royalties or licenses                                                                                                                                                          | ___ None                                                                                     |                                                                                     |
|                                                           |                                                                                                                                                                                |                                                                                              |                                                                                     |
|                                                           |                                                                                                                                                                                |                                                                                              |                                                                                     |

|    |                                                                                                              |          |  |
|----|--------------------------------------------------------------------------------------------------------------|----------|--|
| 4  | Consulting fees                                                                                              | ___ None |  |
| 5  | Payment or honoraria for lectures, presentations, speakers bureaus, manuscript writing or educational events | ___ None |  |
| 6  | Payment for expert testimony                                                                                 | ___ None |  |
| 7  | Support for attending meetings and/or travel                                                                 | ___ None |  |
| 8  | Patents planned, issued or pending                                                                           | ___ None |  |
| 9  | Participation on a Data Safety Monitoring Board or Advisory Board                                            | ___ None |  |
| 10 | Leadership or fiduciary role in other board, society, committee or advocacy group, paid or unpaid            | ___ None |  |
| 11 | Stock or stock options                                                                                       | ___ None |  |
| 12 | Receipt of equipment, materials, drugs, medical writing, gifts or other services                             | ___ None |  |
| 13 | Other financial or non-financial interests                                                                   | ___ None |  |

**Please summarize the above conflict of interest in the following box:**

The study was supported by institutional fundings by Ministry of Health of the Czech Republic [NV18-03-00470].

**Please place an "X" next to the following statement to indicate your agreement:**

**I certify that I have answered every question and have not altered the wording of any of the questions on this form. X**

## ICMJE DISCLOSURE FORM

Date: March 30, 2022

Your Name: Marek Szkorupa

Manuscript Title: Cannabinoid receptor 2 expression in early stage non-small cell lung cancers identifies patients with good prognosis and longer survival

Manuscript number (if known): TLCR-22-247

In the interest of transparency, we ask you to disclose all relationships/activities/interests listed below that are related to the content of your manuscript. "Related" means any relation with for-profit or not-for-profit third parties whose interests may be affected by the content of the manuscript. Disclosure represents a commitment to transparency and does not necessarily indicate a bias. If you are in doubt about whether to list a relationship/activity/interest, it is preferable that you do so.

The following questions apply to the author's relationships/activities/interests as they relate to the current manuscript only.

The author's relationships/activities/interests should be defined broadly. For example, if your manuscript pertains to the epidemiology of hypertension, you should declare all relationships with manufacturers of antihypertensive medication, even if that medication is not mentioned in the manuscript.

In item #1 below, report all support for the work reported in this manuscript without time limit. For all other items, the time frame for disclosure is the past 36 months.

|                                                           |                                                                                                                                                                                | Name all entities with whom you have this relationship or indicate none (add rows as needed) | Specifications/Comments (e.g., if payments were made to you or to your institution) |
|-----------------------------------------------------------|--------------------------------------------------------------------------------------------------------------------------------------------------------------------------------|----------------------------------------------------------------------------------------------|-------------------------------------------------------------------------------------|
| <b>Time frame: Since the initial planning of the work</b> |                                                                                                                                                                                |                                                                                              |                                                                                     |
| 1                                                         | All support for the present manuscript (e.g., funding, provision of study materials, medical writing, article processing charges, etc.)<br><b>No time limit for this item.</b> | Ministry of Health of the Czech Republic [NV18-03-00470]                                     | Institutional funding                                                               |
|                                                           |                                                                                                                                                                                |                                                                                              |                                                                                     |
|                                                           |                                                                                                                                                                                |                                                                                              |                                                                                     |
|                                                           |                                                                                                                                                                                |                                                                                              |                                                                                     |
|                                                           |                                                                                                                                                                                |                                                                                              |                                                                                     |
|                                                           |                                                                                                                                                                                |                                                                                              |                                                                                     |
| <b>Time frame: past 36 months</b>                         |                                                                                                                                                                                |                                                                                              |                                                                                     |
| 2                                                         | Grants or contracts from any entity (if not indicated in item #1 above).                                                                                                       | ___ None                                                                                     |                                                                                     |
|                                                           |                                                                                                                                                                                |                                                                                              |                                                                                     |
|                                                           |                                                                                                                                                                                |                                                                                              |                                                                                     |
| 3                                                         | Royalties or licenses                                                                                                                                                          | ___ None                                                                                     |                                                                                     |
|                                                           |                                                                                                                                                                                |                                                                                              |                                                                                     |
|                                                           |                                                                                                                                                                                |                                                                                              |                                                                                     |

|    |                                                                                                              |                  |  |
|----|--------------------------------------------------------------------------------------------------------------|------------------|--|
| 4  | Consulting fees                                                                                              | <u>    </u> None |  |
|    |                                                                                                              |                  |  |
|    |                                                                                                              |                  |  |
| 5  | Payment or honoraria for lectures, presentations, speakers bureaus, manuscript writing or educational events | <u>    </u> None |  |
|    |                                                                                                              |                  |  |
|    |                                                                                                              |                  |  |
| 6  | Payment for expert testimony                                                                                 | <u>    </u> None |  |
|    |                                                                                                              |                  |  |
|    |                                                                                                              |                  |  |
| 7  | Support for attending meetings and/or travel                                                                 | <u>    </u> None |  |
|    |                                                                                                              |                  |  |
|    |                                                                                                              |                  |  |
| 8  | Patents planned, issued or pending                                                                           | <u>    </u> None |  |
|    |                                                                                                              |                  |  |
|    |                                                                                                              |                  |  |
| 9  | Participation on a Data Safety Monitoring Board or Advisory Board                                            | <u>    </u> None |  |
|    |                                                                                                              |                  |  |
|    |                                                                                                              |                  |  |
| 10 | Leadership or fiduciary role in other board, society, committee or advocacy group, paid or unpaid            | <u>    </u> None |  |
|    |                                                                                                              |                  |  |
|    |                                                                                                              |                  |  |
| 11 | Stock or stock options                                                                                       | <u>    </u> None |  |
|    |                                                                                                              |                  |  |
|    |                                                                                                              |                  |  |
| 12 | Receipt of equipment, materials, drugs, medical writing, gifts or other services                             | <u>    </u> None |  |
|    |                                                                                                              |                  |  |
|    |                                                                                                              |                  |  |
| 13 | Other financial or non-financial interests                                                                   | <u>    </u> None |  |
|    |                                                                                                              |                  |  |
|    |                                                                                                              |                  |  |

**Please summarize the above conflict of interest in the following box:**

The study was supported by institutional fundings by Ministry of Health of the Czech Republic [NV18-03-00470].

**Please place an "X" next to the following statement to indicate your agreement:**

**I certify that I have answered every question and have not altered the wording of any of the questions on this form. X**



## ICMJE DISCLOSURE FORM

Date: March 30, 2022

Your Name: Jiri Klein

Manuscript Title: Cannabinoid receptor 2 expression in early stage non-small cell lung cancers identifies patients with good prognosis and longer survival

Manuscript number (if known): TLCR-22-247

In the interest of transparency, we ask you to disclose all relationships/activities/interests listed below that are related to the content of your manuscript. "Related" means any relation with for-profit or not-for-profit third parties whose interests may be affected by the content of the manuscript. Disclosure represents a commitment to transparency and does not necessarily indicate a bias. If you are in doubt about whether to list a relationship/activity/interest, it is preferable that you do so.

The following questions apply to the author's relationships/activities/interests as they relate to the current manuscript only.

The author's relationships/activities/interests should be defined broadly. For example, if your manuscript pertains to the epidemiology of hypertension, you should declare all relationships with manufacturers of antihypertensive medication, even if that medication is not mentioned in the manuscript.

In item #1 below, report all support for the work reported in this manuscript without time limit. For all other items, the time frame for disclosure is the past 36 months.

|                                                           |                                                                                                                                                                                | Name all entities with whom you have this relationship or indicate none (add rows as needed) | Specifications/Comments (e.g., if payments were made to you or to your institution) |
|-----------------------------------------------------------|--------------------------------------------------------------------------------------------------------------------------------------------------------------------------------|----------------------------------------------------------------------------------------------|-------------------------------------------------------------------------------------|
| <b>Time frame: Since the initial planning of the work</b> |                                                                                                                                                                                |                                                                                              |                                                                                     |
| 1                                                         | All support for the present manuscript (e.g., funding, provision of study materials, medical writing, article processing charges, etc.)<br><b>No time limit for this item.</b> | Ministry of Health of the Czech Republic [NV18-03-00470]                                     | Institutional funding                                                               |
|                                                           |                                                                                                                                                                                |                                                                                              |                                                                                     |
|                                                           |                                                                                                                                                                                |                                                                                              |                                                                                     |
|                                                           |                                                                                                                                                                                |                                                                                              |                                                                                     |
|                                                           |                                                                                                                                                                                |                                                                                              |                                                                                     |
|                                                           |                                                                                                                                                                                |                                                                                              |                                                                                     |
| <b>Time frame: past 36 months</b>                         |                                                                                                                                                                                |                                                                                              |                                                                                     |
| 2                                                         | Grants or contracts from any entity (if not indicated in item #1 above).                                                                                                       | ___ None                                                                                     |                                                                                     |
|                                                           |                                                                                                                                                                                |                                                                                              |                                                                                     |
| 3                                                         | Royalties or licenses                                                                                                                                                          | ___ None                                                                                     |                                                                                     |
|                                                           |                                                                                                                                                                                |                                                                                              |                                                                                     |
|                                                           |                                                                                                                                                                                |                                                                                              |                                                                                     |

|    |                                                                                                              |                  |  |
|----|--------------------------------------------------------------------------------------------------------------|------------------|--|
| 4  | Consulting fees                                                                                              | <u>    </u> None |  |
|    |                                                                                                              |                  |  |
|    |                                                                                                              |                  |  |
| 5  | Payment or honoraria for lectures, presentations, speakers bureaus, manuscript writing or educational events | <u>    </u> None |  |
|    |                                                                                                              |                  |  |
|    |                                                                                                              |                  |  |
| 6  | Payment for expert testimony                                                                                 | <u>    </u> None |  |
|    |                                                                                                              |                  |  |
|    |                                                                                                              |                  |  |
| 7  | Support for attending meetings and/or travel                                                                 | <u>    </u> None |  |
|    |                                                                                                              |                  |  |
|    |                                                                                                              |                  |  |
| 8  | Patents planned, issued or pending                                                                           | <u>    </u> None |  |
|    |                                                                                                              |                  |  |
|    |                                                                                                              |                  |  |
| 9  | Participation on a Data Safety Monitoring Board or Advisory Board                                            | <u>    </u> None |  |
|    |                                                                                                              |                  |  |
|    |                                                                                                              |                  |  |
| 10 | Leadership or fiduciary role in other board, society, committee or advocacy group, paid or unpaid            | <u>    </u> None |  |
|    |                                                                                                              |                  |  |
|    |                                                                                                              |                  |  |
| 11 | Stock or stock options                                                                                       | <u>    </u> None |  |
|    |                                                                                                              |                  |  |
|    |                                                                                                              |                  |  |
| 12 | Receipt of equipment, materials, drugs, medical writing, gifts or other services                             | <u>    </u> None |  |
|    |                                                                                                              |                  |  |
|    |                                                                                                              |                  |  |
| 13 | Other financial or non-financial interests                                                                   | <u>    </u> None |  |
|    |                                                                                                              |                  |  |
|    |                                                                                                              |                  |  |

**Please summarize the above conflict of interest in the following box:**

The study was supported by institutional fundings by Ministry of Health of the Czech Republic [NV18-03-00470].

**Please place an "X" next to the following statement to indicate your agreement:**

**I certify that I have answered every question and have not altered the wording of any of the questions on this form. X**

## ICMJE DISCLOSURE FORM

Date: March 30, 2022

Your Name: Jozef Skarda

Manuscript Title: Cannabinoid receptor 2 expression in early stage non-small cell lung cancers identifies patients with good prognosis and longer survival

Manuscript number (if known): TLCR-22-247

In the interest of transparency, we ask you to disclose all relationships/activities/interests listed below that are related to the content of your manuscript. "Related" means any relation with for-profit or not-for-profit third parties whose interests may be affected by the content of the manuscript. Disclosure represents a commitment to transparency and does not necessarily indicate a bias. If you are in doubt about whether to list a relationship/activity/interest, it is preferable that you do so.

The following questions apply to the author's relationships/activities/interests as they relate to the current manuscript only.

The author's relationships/activities/interests should be defined broadly. For example, if your manuscript pertains to the epidemiology of hypertension, you should declare all relationships with manufacturers of antihypertensive medication, even if that medication is not mentioned in the manuscript.

In item #1 below, report all support for the work reported in this manuscript without time limit. For all other items, the time frame for disclosure is the past 36 months.

|                                                           |                                                                                                                                                                                | Name all entities with whom you have this relationship or indicate none (add rows as needed) | Specifications/Comments (e.g., if payments were made to you or to your institution) |
|-----------------------------------------------------------|--------------------------------------------------------------------------------------------------------------------------------------------------------------------------------|----------------------------------------------------------------------------------------------|-------------------------------------------------------------------------------------|
| <b>Time frame: Since the initial planning of the work</b> |                                                                                                                                                                                |                                                                                              |                                                                                     |
| 1                                                         | All support for the present manuscript (e.g., funding, provision of study materials, medical writing, article processing charges, etc.)<br><b>No time limit for this item.</b> | Ministry of Health of the Czech Republic [NV18-03-00470]                                     | Institutional funding                                                               |
|                                                           |                                                                                                                                                                                |                                                                                              |                                                                                     |
|                                                           |                                                                                                                                                                                |                                                                                              |                                                                                     |
|                                                           |                                                                                                                                                                                |                                                                                              |                                                                                     |
|                                                           |                                                                                                                                                                                |                                                                                              |                                                                                     |
|                                                           |                                                                                                                                                                                |                                                                                              |                                                                                     |
| <b>Time frame: past 36 months</b>                         |                                                                                                                                                                                |                                                                                              |                                                                                     |
| 2                                                         | Grants or contracts from any entity (if not indicated in item #1 above).                                                                                                       | ___ None                                                                                     |                                                                                     |
|                                                           |                                                                                                                                                                                |                                                                                              |                                                                                     |
| 3                                                         | Royalties or licenses                                                                                                                                                          | ___ None                                                                                     |                                                                                     |
|                                                           |                                                                                                                                                                                |                                                                                              |                                                                                     |
|                                                           |                                                                                                                                                                                |                                                                                              |                                                                                     |

|    |                                                                                                              |                  |  |
|----|--------------------------------------------------------------------------------------------------------------|------------------|--|
| 4  | Consulting fees                                                                                              | <u>    </u> None |  |
|    |                                                                                                              |                  |  |
|    |                                                                                                              |                  |  |
| 5  | Payment or honoraria for lectures, presentations, speakers bureaus, manuscript writing or educational events | <u>    </u> None |  |
|    |                                                                                                              |                  |  |
|    |                                                                                                              |                  |  |
| 6  | Payment for expert testimony                                                                                 | <u>    </u> None |  |
|    |                                                                                                              |                  |  |
|    |                                                                                                              |                  |  |
| 7  | Support for attending meetings and/or travel                                                                 | <u>    </u> None |  |
|    |                                                                                                              |                  |  |
|    |                                                                                                              |                  |  |
| 8  | Patents planned, issued or pending                                                                           | <u>    </u> None |  |
|    |                                                                                                              |                  |  |
|    |                                                                                                              |                  |  |
| 9  | Participation on a Data Safety Monitoring Board or Advisory Board                                            | <u>    </u> None |  |
|    |                                                                                                              |                  |  |
|    |                                                                                                              |                  |  |
| 10 | Leadership or fiduciary role in other board, society, committee or advocacy group, paid or unpaid            | <u>    </u> None |  |
|    |                                                                                                              |                  |  |
|    |                                                                                                              |                  |  |
| 11 | Stock or stock options                                                                                       | <u>    </u> None |  |
|    |                                                                                                              |                  |  |
|    |                                                                                                              |                  |  |
| 12 | Receipt of equipment, materials, drugs, medical writing, gifts or other services                             | <u>    </u> None |  |
|    |                                                                                                              |                  |  |
|    |                                                                                                              |                  |  |
| 13 | Other financial or non-financial interests                                                                   | <u>    </u> None |  |
|    |                                                                                                              |                  |  |
|    |                                                                                                              |                  |  |

**Please summarize the above conflict of interest in the following box:**

The study was supported by institutional fundings by Ministry of Health of the Czech Republic [NV18-03-00470].

**Please place an “X” next to the following statement to indicate your agreement:**

**I certify that I have answered every question and have not altered the wording of any of the questions on this form. X**

## ICMJE DISCLOSURE FORM

Date: March 30, 2022

Your Name: Josef Srovnal

Manuscript Title: Cannabinoid receptor 2 expression in early stage non-small cell lung cancers identifies patients with good prognosis and longer survival

Manuscript number (if known): TLCR-22-247

In the interest of transparency, we ask you to disclose all relationships/activities/interests listed below that are related to the content of your manuscript. "Related" means any relation with for-profit or not-for-profit third parties whose interests may be affected by the content of the manuscript. Disclosure represents a commitment to transparency and does not necessarily indicate a bias. If you are in doubt about whether to list a relationship/activity/interest, it is preferable that you do so.

The following questions apply to the author's relationships/activities/interests as they relate to the current manuscript only.

The author's relationships/activities/interests should be defined broadly. For example, if your manuscript pertains to the epidemiology of hypertension, you should declare all relationships with manufacturers of antihypertensive medication, even if that medication is not mentioned in the manuscript.

In item #1 below, report all support for the work reported in this manuscript without time limit. For all other items, the time frame for disclosure is the past 36 months.

|                                                           |                                                                                                                                                                                | Name all entities with whom you have this relationship or indicate none (add rows as needed) | Specifications/Comments (e.g., if payments were made to you or to your institution) |
|-----------------------------------------------------------|--------------------------------------------------------------------------------------------------------------------------------------------------------------------------------|----------------------------------------------------------------------------------------------|-------------------------------------------------------------------------------------|
| <b>Time frame: Since the initial planning of the work</b> |                                                                                                                                                                                |                                                                                              |                                                                                     |
| 1                                                         | All support for the present manuscript (e.g., funding, provision of study materials, medical writing, article processing charges, etc.)<br><b>No time limit for this item.</b> | Ministry of Health of the Czech Republic [NV18-03-00470]                                     | Institutional funding                                                               |
|                                                           |                                                                                                                                                                                | Ministry of Education, Youth and Sport of the Czech Republic [LM2018125, LM2018133]          | Institutional funding                                                               |
|                                                           |                                                                                                                                                                                | Palacky University Olomouc [LF 2021_019]                                                     | Institutional funding                                                               |
|                                                           |                                                                                                                                                                                | Technological Agency of the Czech Republic [TN01000013]                                      | Institutional funding                                                               |
|                                                           |                                                                                                                                                                                | European Union - Next Generation EU (Programme EXCELES, ID Project No. LX22NPO5102)          | Institutional funding                                                               |
|                                                           |                                                                                                                                                                                | Cancer Research Czech Republic                                                               | Institutional funding                                                               |

| Time frame: past 36 months |                                                                                                              |                   |                                                                |
|----------------------------|--------------------------------------------------------------------------------------------------------------|-------------------|----------------------------------------------------------------|
| 2                          | Grants or contracts from any entity (if not indicated in item #1 above).                                     | ___ None          |                                                                |
| 3                          | Royalties or licenses                                                                                        | ___ None          |                                                                |
| 4                          | Consulting fees                                                                                              | ___ None          |                                                                |
| 5                          | Payment or honoraria for lectures, presentations, speakers bureaus, manuscript writing or educational events | ___ None          |                                                                |
| 6                          | Payment for expert testimony                                                                                 | ___ None          |                                                                |
| 7                          | Support for attending meetings and/or travel                                                                 | ___ None          |                                                                |
| 8                          | Patents planned, issued or pending                                                                           | ___ None          |                                                                |
| 9                          | Participation on a Data Safety Monitoring Board or Advisory Board                                            | ___ None          |                                                                |
| 10                         | Leadership or fiduciary role in other board, society, committee or advocacy group, paid or unpaid            | ___ None          |                                                                |
| 11                         | Stock or stock options                                                                                       | Intellmed, s.r.o. | Co-founder of spin-off company. No relation to the Manuscript. |
| 12                         | Receipt of equipment, materials, drugs, medical writing, gifts or other services                             | ___ None          |                                                                |
| 13                         | Other financial or non-financial interests                                                                   | ___ None          |                                                                |

**Please summarize the above conflict of interest in the following box:**

The study was supported by institutional fundings by Ministry of Health of the Czech Republic [NV18-03-00470], Ministry of Education, Youth and Sport of the Czech Republic [LM2018125, LM2018133], Palacky University Olomouc [LF 2021\_019], Technological Agency of the Czech Republic [TN01000013] and European Union - Next Generation EU (Programme EXCELES, ID Project No. LX22NPO5102) and Cancer Research Czech Republic. The author is co-founder of spin-off company Intellmed, Ltd., and Cancer Research Czech Republic Foundation with no relation to the Manuscript.

**Please place an "X" next to the following statement to indicate your agreement:**

**I certify that I have answered every question and have not altered the wording of any of the questions on this form. X**

## ICMJE DISCLOSURE FORM

Date: March 30, 2022

Your Name: Marian Hajduch

Manuscript Title: Cannabinoid receptor 2 expression in early stage non-small cell lung cancers identifies patients with good prognosis and longer survival

Manuscript number (if known): TLCR-22-247

In the interest of transparency, we ask you to disclose all relationships/activities/interests listed below that are related to the content of your manuscript. "Related" means any relation with for-profit or not-for-profit third parties whose interests may be affected by the content of the manuscript. Disclosure represents a commitment to transparency and does not necessarily indicate a bias. If you are in doubt about whether to list a relationship/activity/interest, it is preferable that you do so.

The following questions apply to the author's relationships/activities/interests as they relate to the current manuscript only.

The author's relationships/activities/interests should be defined broadly. For example, if your manuscript pertains to the epidemiology of hypertension, you should declare all relationships with manufacturers of antihypertensive medication, even if that medication is not mentioned in the manuscript.

In item #1 below, report all support for the work reported in this manuscript without time limit. For all other items, the time frame for disclosure is the past 36 months.

|                                                           |                                                                                                                                                                                | Name all entities with whom you have this relationship or indicate none (add rows as needed)                                                                                                                                                                                                                                                                                                        | Specifications/Comments (e.g., if payments were made to you or to your institution)                                                       |
|-----------------------------------------------------------|--------------------------------------------------------------------------------------------------------------------------------------------------------------------------------|-----------------------------------------------------------------------------------------------------------------------------------------------------------------------------------------------------------------------------------------------------------------------------------------------------------------------------------------------------------------------------------------------------|-------------------------------------------------------------------------------------------------------------------------------------------|
| <b>Time frame: Since the initial planning of the work</b> |                                                                                                                                                                                |                                                                                                                                                                                                                                                                                                                                                                                                     |                                                                                                                                           |
| 1                                                         | All support for the present manuscript (e.g., funding, provision of study materials, medical writing, article processing charges, etc.)<br><b>No time limit for this item.</b> | Ministry of Health of the Czech Republic [NV18-03-00470]<br><br>Ministry of Education, Youth and Sport of the Czech Republic [LM2018125, LM2018133]<br><br>Palacky University Olomouc [LF 2021_019]<br><br>Technological Agency of the Czech Republic [TN01000013]<br><br>European Union - Next Generation EU (Programme EXCELES, ID Project No. LX22NPO5102)<br><br>Cancer Research Czech Republic | Institutional funding<br><br>Institutional funding<br><br>Institutional funding<br><br>Institutional funding<br><br>Institutional funding |



| Time frame: past 36 months |                                                                                                              |                   |                                                             |
|----------------------------|--------------------------------------------------------------------------------------------------------------|-------------------|-------------------------------------------------------------|
| 2                          | Grants or contracts from any entity (if not indicated in item #1 above).                                     | ___ None          |                                                             |
| 3                          | Royalties or licenses                                                                                        | ___ None          |                                                             |
| 4                          | Consulting fees                                                                                              | ___ None          |                                                             |
| 5                          | Payment or honoraria for lectures, presentations, speakers bureaus, manuscript writing or educational events | ___ None          |                                                             |
| 6                          | Payment for expert testimony                                                                                 | ___ None          |                                                             |
| 7                          | Support for attending meetings and/or travel                                                                 | ___ None          |                                                             |
| 8                          | Patents planned, issued or pending                                                                           | ___ None          |                                                             |
| 9                          | Participation on a Data Safety Monitoring Board or Advisory Board                                            | ___ None          |                                                             |
| 10                         | Leadership or fiduciary role in other board, society, committee or advocacy group, paid or unpaid            | ___ None          |                                                             |
| 11                         | Stock or stock options                                                                                       | Intellmed, s.r.o. | Founder of spin-off company. No relation to the Manuscript. |
| 12                         | Receipt of equipment, materials, drugs, medical writing, gifts or other services                             | ___ None          |                                                             |
| 13                         | Other financial or non-financial interests                                                                   | ___ None          |                                                             |

**Please summarize the above conflict of interest in the following box:**

The study was supported by institutional fundings by Ministry of Health of the Czech Republic [NV18-03-00470], Ministry of Education, Youth and Sport of the Czech Republic [LM2018125, LM2018133], Palacky University Olomouc [LF 2021\_019], Technological Agency of the Czech Republic [TN01000013] and European Union - Next Generation EU (Programme EXCELES, ID Project No. LX22NPO5102) and Cancer Research Czech Republic. The author is co-founder of spin-off company Intellmed, Ltd., and Cancer Research Czech Republic Foundation with no relation to the Manuscript.

**Please place an "X" next to the following statement to indicate your agreement:**

**I certify that I have answered every question and have not altered the wording of any of the questions on this form. X**
