# Supplementary material for: Cannabinoid receptor 2 expression in early-stage non-small cell lung cancers identifies patients with good prognosis and longer survival
Source: PubMed Central journal article supplement — Transl Lung Cancer Res. 2022 Oct;11(10):2040–50. doi: 10.21037/tlcr-22-247 (PMC9641041; doi:10.21037/tlcr-22-247), 2022-10
Supplement: tlcr-11-10-2040-dss.pdf [file tlcr-11-10-2040-dss.pdf]

## Data Sharing Statement

|                     |                                                                                                                                                     |                                                                                                                                                  |
|---------------------|-----------------------------------------------------------------------------------------------------------------------------------------------------|--------------------------------------------------------------------------------------------------------------------------------------------------|
| <b>Article Info</b> | <a href="https://dx.doi.org/10.21037/tlcr-22-247">https://dx.doi.org/10.21037/tlcr-22-247</a>                                                       |                                                                                                                                                  |
| <b>Item</b>         | <b>Question</b>                                                                                                                                     | <b>Authors' Response<br/>(place "-" if not applicable)</b>                                                                                       |
| 1                   | Would you like to share data collected for your study to others?                                                                                    | Yes.                                                                                                                                             |
| 2                   | If not, would you like to share the reason for your decision?                                                                                       | -                                                                                                                                                |
| 3                   | What data in particular will be shared?                                                                                                             | Clinical-pathological characteristics, survival data, RT-PCR results, IHC results.                                                               |
| 4                   | Any other documents will be shared? Such as study protocol, statistical analysis plan, informed consent form, clinical study report, analytic code. | -                                                                                                                                                |
| 5                   | When will data availability begin?                                                                                                                  | Currently available.                                                                                                                             |
| 6                   | When will data availability end?                                                                                                                    | No limited.                                                                                                                                      |
| 7                   | To whom will you share the data?                                                                                                                    | Public.                                                                                                                                          |
| 8                   | For what type of analysis or purpose?                                                                                                               | Statistical analyses.                                                                                                                            |
| 9                   | How or where can the data/documents be obtained?                                                                                                    | Data will be publicly available at Figshare Database. <a href="https://figshare.com">https://figshare.com</a> (DOI 10.6084/m9.figshare.6321242). |
| 10                  | Any other restrictions?                                                                                                                             | -                                                                                                                                                |
