# Supplementary material for: Cannabinoid receptor 2 expression in early-stage non-small cell lung cancers identifies patients with good prognosis and longer survival
Source: PubMed Central journal article supplement — Transl Lung Cancer Res. 2022 Oct;11(10):2040–50. doi: 10.21037/tlcr-22-247 (PMC9641041; doi:10.21037/tlcr-22-247), 2022-10
Supplement: tlcr-11-10-2040-supplementary.pdf [file tlcr-11-10-2040-supplementary.pdf]

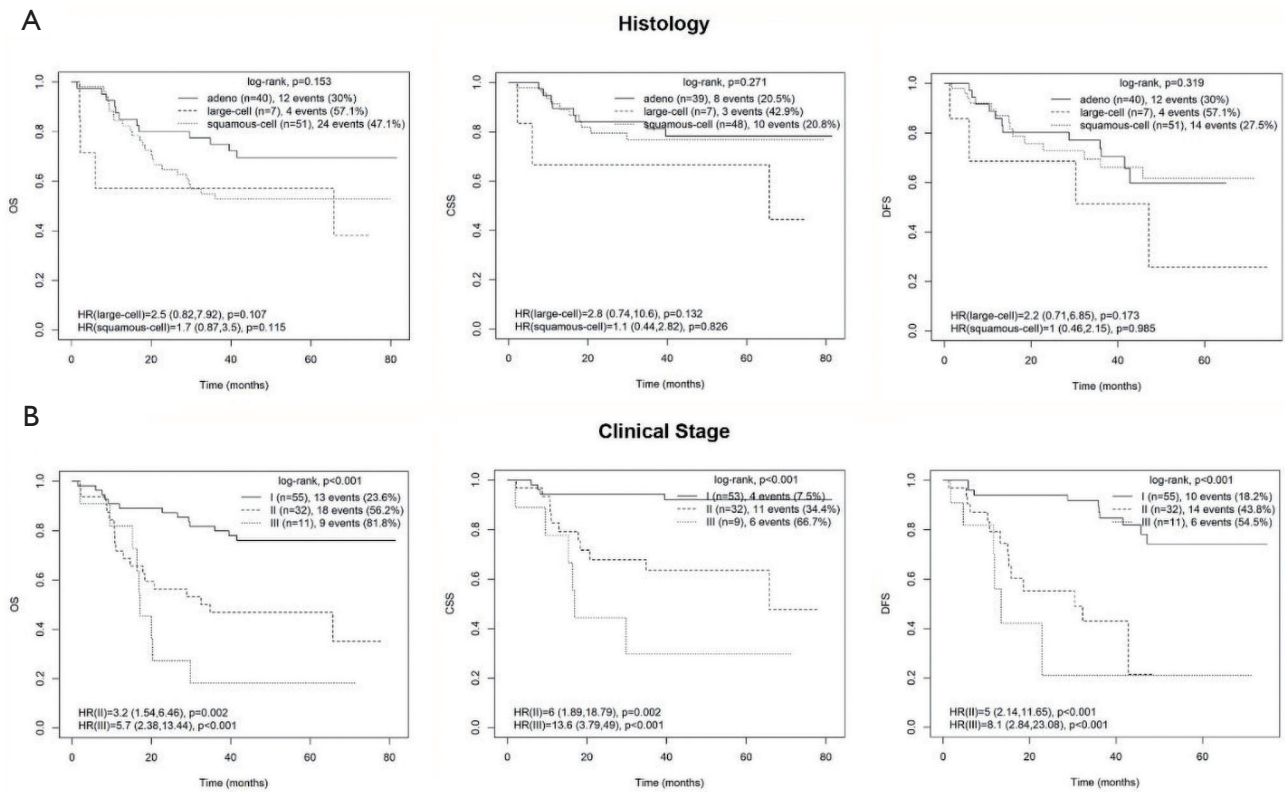

**Figure S1** Kaplan-Meier analysis of OS, CSS, and DFS for CB2 tumor tissue gene expression positivity in NSCLC patients with (A) and without adjuvant chemotherapy (B). neg., negative; pos., positive; HR, hazard ratio; OS, overall survival; CSS, cancer specific survival; DFS, disease free survival; CB2, cannabinoid receptor 2; NSCLC, non-small cell lung cancer.

**Table S1** Eight multivariate Cox models (stratified by the stage variable and with age and gender as an adjusting variables) analyzing the influence of tested variables *CB1* (qRT-PCR), *CB1* (IHC), *CB2* (qRT-PCR) and *CB2* (IHC) on CSS and DFS

| Adjusting variables | <i>CB1</i> gene (qRT-PCR) |             |         | <i>CB1</i> protein (IHC) |             |         | <i>CB2</i> gene (qRT-PCR) |             |         | <i>CB2</i> protein (IHC) |             |         |
|---------------------|---------------------------|-------------|---------|--------------------------|-------------|---------|---------------------------|-------------|---------|--------------------------|-------------|---------|
|                     | HR                        | 95% CI      | P value | HR                       | 95% CI      | P value | HR                        | 95% CI      | P value | HR                       | 95% CI      | P value |
| <b>CSS</b>          |                           |             |         |                          |             |         |                           |             |         |                          |             |         |
| Age                 | 1.101                     | 1.022–1.186 | 0.011   | 1.088                    | 1.002–1.181 | 0.045   | 1.120                     | 1.037–1.210 | 0.004   | 1.089                    | 1.011–1.174 | 0.025   |
| Gender (male)       | 0.551                     | 0.195–1.559 | 0.262   | 0.517                    | 0.166–1.613 | 0.256   | 0.521                     | 0.177–1.532 | 0.236   | 0.557                    | 0.188–1.652 | 0.291   |
| CB positivity       | 0.508                     | 0.113–2.284 | 0.377   | 1.325                    | 0.378–4.635 | 0.660   | 0.274                     | 0.099–0.759 | 0.013   | 1.261                    | 0.451–3.523 | 0.658   |
| <b>DFS</b>          |                           |             |         |                          |             |         |                           |             |         |                          |             |         |
| Age                 | 1.032                     | 0.985–1.081 | 0.179   | 1.015                    | 0.963–1.071 | 0.579   | 1.042                     | 0.995–1.091 | 0.077   | 1.017                    | 0.969–1.067 | 0.499   |
| Gender (male)       | 0.824                     | 0.359–1.890 | 0.648   | 0.715                    | 0.295–1.734 | 0.457   | 0.675                     | 0.290–1.571 | 0.362   | 0.803                    | 0.346–1.863 | 0.609   |
| CB positivity       | 0.418                     | 0.122–1.436 | 0.166   | 1.343                    | 0.532–3.389 | 0.532   | 0.322                     | 0.137–0.756 | 0.009   | 1.331                    | 0.579–3.057 | 0.501   |

CB, cannabinoid receptor; qRT-PCR, quantitative reverse-transcriptase polymerase chain reaction; IHC, immunohistochemistry; CSS, cancer specific survival; DFS, disease free survival; HR, hazard ratio; CI, confidence interval;

**Table S2** Three multivariate Cox models (stratified by the stage variable and with age and gender as an adjusting variables) analyzing the influence of positivity of *CB2* (qRT-PCR) on CSS and DFS with different adjusting variables weight, BMI and chemotherapy administration

| Adjusting variables                               | CSS   |             |         | DFS   |             |         |
|---------------------------------------------------|-------|-------------|---------|-------|-------------|---------|
|                                                   | HR    | 95% CI      | P value | HR    | 95% CI      | P value |
| <b>A</b>                                          |       |             |         |       |             |         |
| Age                                               | 1.128 | 1.038–1.227 | 0.005   | 1.043 | 0.996–1.092 | 0.077   |
| Gender (male)                                     | 0.627 | 0.196–2.006 | 0.432   | 0.660 | 0.264–1.650 | 0.374   |
| Weight                                            | 0.978 | 0.945–1.013 | 0.213   | 1.002 | 0.974–1.030 | 0.901   |
| <i>CB2</i> gene qRT-PCR positivity ( $\leq 1.0$ ) | 0.254 | 0.087–0.744 | 0.012   | 0.323 | 0.137–0.760 | 0.010   |
| <b>B</b>                                          |       |             |         |       |             |         |
| Age                                               | 1.123 | 1.036–1.217 | 0.005   | 1.042 | 0.995–1.092 | 0.080   |
| Gender (male)                                     | 0.527 | 0.174–1.600 | 0.258   | 0.677 | 0.289–1.582 | 0.367   |
| BMI                                               | 0.957 | 0.860–1.066 | 0.425   | 0.999 | 0.919–1.085 | 0.972   |
| <i>CB2</i> gene qRT-PCR positivity ( $\leq 1.0$ ) | 0.268 | 0.094–0.762 | 0.014   | 0.321 | 0.137–0.756 | 0.009   |
| <b>C</b>                                          |       |             |         |       |             |         |
| Age                                               | 1.115 | 1.033–1.203 | 0.005   | 1.041 | 0.995–1.090 | 0.084   |
| Gender (male)                                     | 0.561 | 0.189–1.664 | 0.298   | 0.707 | 0.304–1.649 | 0.423   |
| Chemotherapy yes                                  | 0.576 | 0.150–2.211 | 0.421   | 0.602 | 0.175–2.066 | 0.420   |
| <i>CB2</i> gene qRT-PCR positivity ( $\leq 1.0$ ) | 0.272 | 0.099–0.747 | 0.012   | 0.317 | 0.136–0.738 | 0.008   |

CB, cannabionoid receptor; qRT-PCR, quantitative reverse-transcriptase polymerase chain reaction; CSS, cancer specific survival; DFS, disease free survival; BMI, body mass index; HR, hazard ratio; CI, confidence interval.

**Table S3** Survival parameters of the cohort in months

| Stage I–III | N  | Events     | 3-year-survival |
|-------------|----|------------|-----------------|
| OS          | 98 | 40 (40.8%) | 63.2%±4.9%      |
| CSS         | 94 | 21 (22.3%) | 78.2%±4.4%      |
| DFS         | 98 | 30 (30.6%) | 70%±5.2%        |

N, number; OS, overall survival; CSS, cancer specific survival; DFS, disease free survival.

**Table S4** The contingency tables of *CB1* and *CB2* gene (qRT-PCR) and protein (IHC) expressions

| Gene and protein expressions | CB1 gene (qRT-PCR) |                      | CB2 gene (qRT-PCR) |                     |
|------------------------------|--------------------|----------------------|--------------------|---------------------|
|                              | neg. (>11.2)       | pos. ( $\leq 11.2$ ) | neg. (>1.0)        | pos. ( $\leq 1.0$ ) |
| <b>CB1 protein (IHC)</b>     |                    |                      |                    |                     |
| Weak                         | 36                 | 8                    | –                  | –                   |
| High                         | 20                 | 7                    | –                  | –                   |
| P value                      | 0.634              |                      | –                  |                     |
| <b>CB2 protein (IHC)</b>     |                    |                      |                    |                     |
| Weak                         | –                  | –                    | 6                  | 44                  |
| High                         | –                  | –                    | 6                  | 17                  |
| P value                      | –                  |                      | 0.176              |                     |

CB, cannabionoid receptor; qRT-PCR, quantitative reverse-transcriptase polymerase chain reaction; IHC, immunohistochemistry; neg., negative; pos., positive.
